# Supplementary material
Source: MDPI journal article supplement (https://www.mdpi.com/2073-4441/11/4/836)
Supplement: s1 [file s1]

### **Supplementary Materials**

The link below points to Oak Ridge National Laboratory's Center for Biomass Sustainability's visualization and data page. The first item is a visualization of trade-offs between water surplus and algal biomass created in R Shiny and hosted by Shinyapp.io: <https://cbes.ornl.gov/data-visualizations/>.

Please select as the spatial extent 'USA' in the left margin. The data will display at the bottom of the main panel. Next, click on the graphic icons to see the trade-offs (top, main panel) and histograms (bottom, left). Graphs can be downloaded by clicking on the 'download' icon.
